# Supplementary material for: Sensitivity of treatment-free survival to subgroup analyses in patients with advanced melanoma treated with immune checkpoint inhibitors
Source: PubMed Central journal article supplement — Melanoma Res. 2021 Oct 20;32(1):35–44. doi: 10.1097/CMR.0000000000000793 (PMC8691370; doi:10.1097/cmr.0000000000000793), 2021-10-20

**Sensitivity of treatment-free survival to subgroup analyses in patients with advanced melanoma treated with immune checkpoint inhibitors**

**Supplementary Appendix**

**Fig. S1.** Estimates of TFS and other health states over the 36-month period in patient subgroups based on (a) ECOG performance status and (b) sex in patients treated with nivolumab plus ipilimumab. ECOG, Eastern Cooperative Oncology Group; ICI, immune checkpoint inhibitor; TFS, treatment-free survival.

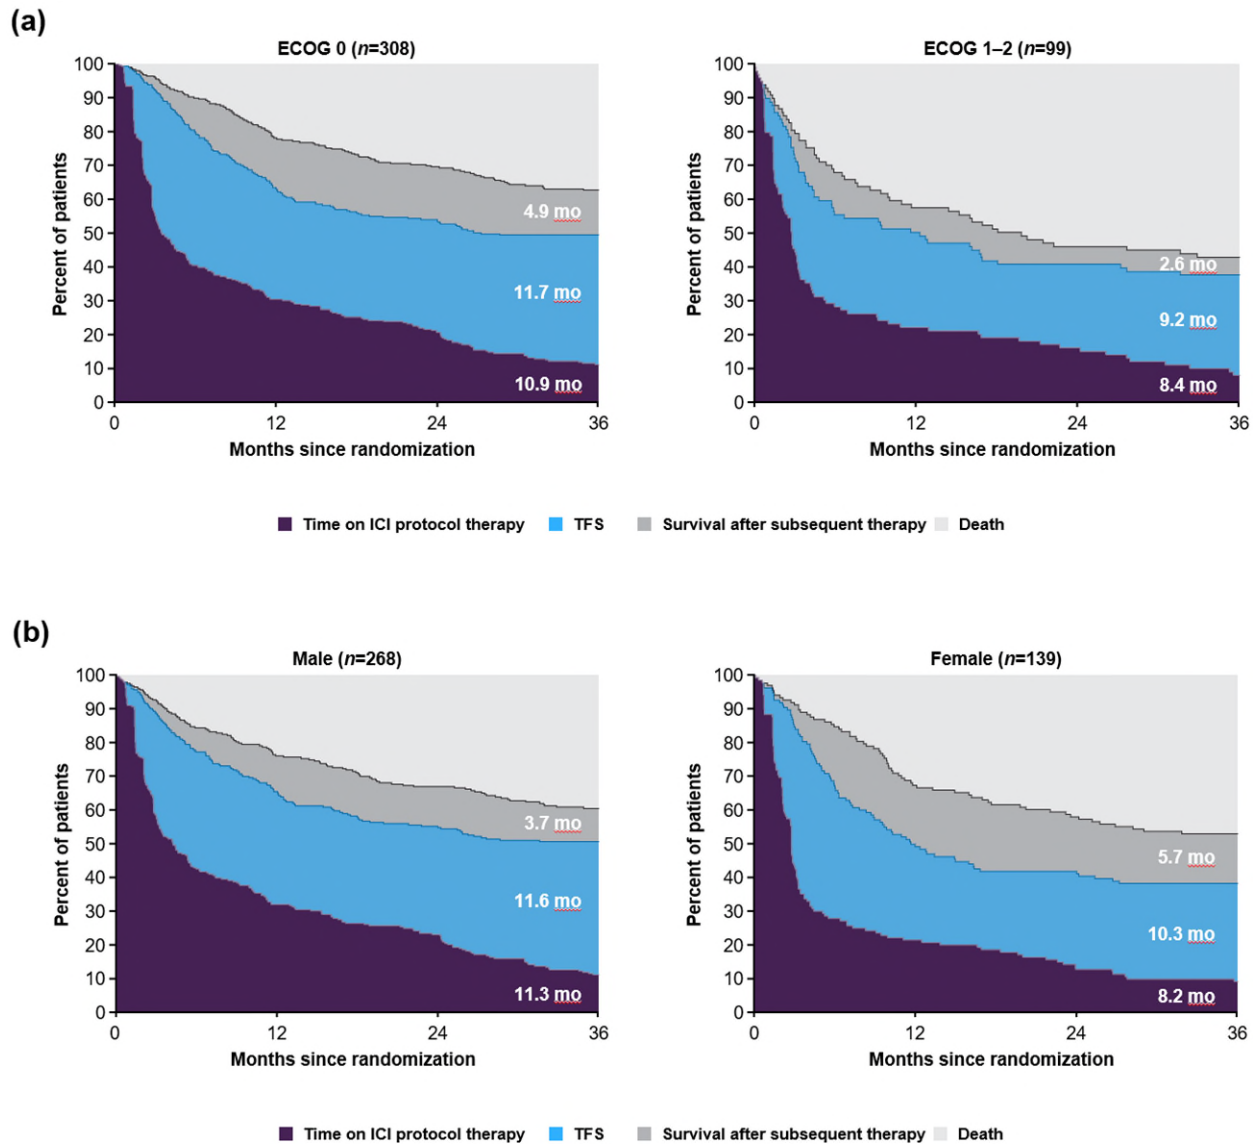

**Fig S2.** Estimates of TFS and other health states over the 36-month period in patient subgroups based on (a) ECOG performance status and (b) sex in patients treated with nivolumab. ECOG, Eastern Cooperative Oncology Group; ICI, immune checkpoint inhibitor; TFS, treatment-free survival.

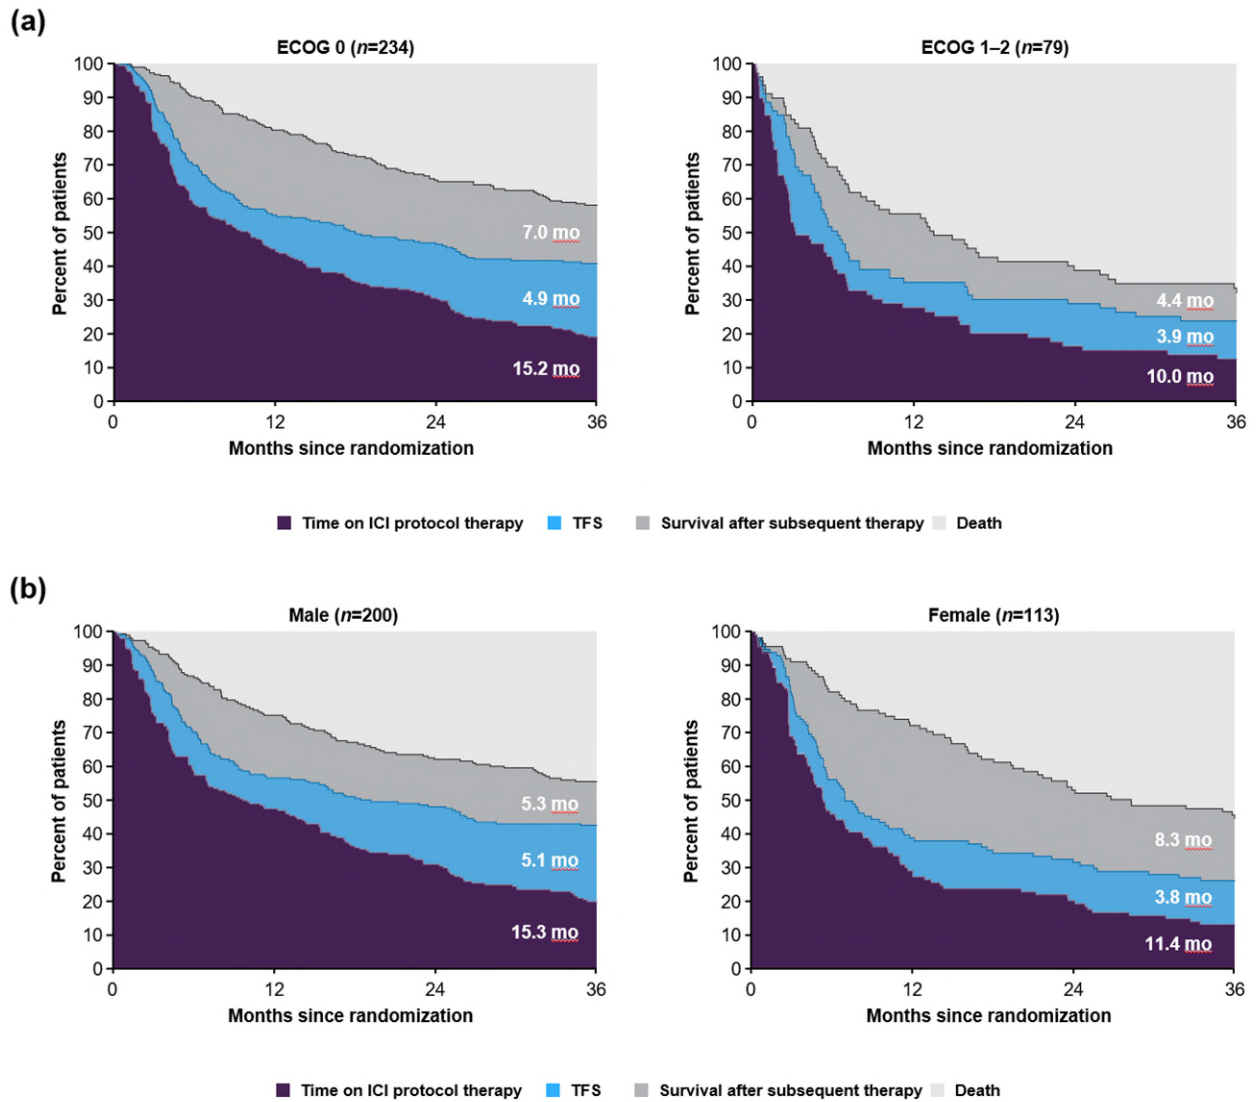

**Fig. S3.** Estimates of TFS and other health states over the 36-month period in patient subgroups based on (a) ECOG performance status and (b) sex in patients treated with ipilimumab. ECOG, Eastern Cooperative Oncology Group; ICI, immune checkpoint inhibitor; TFS, treatment-free survival.

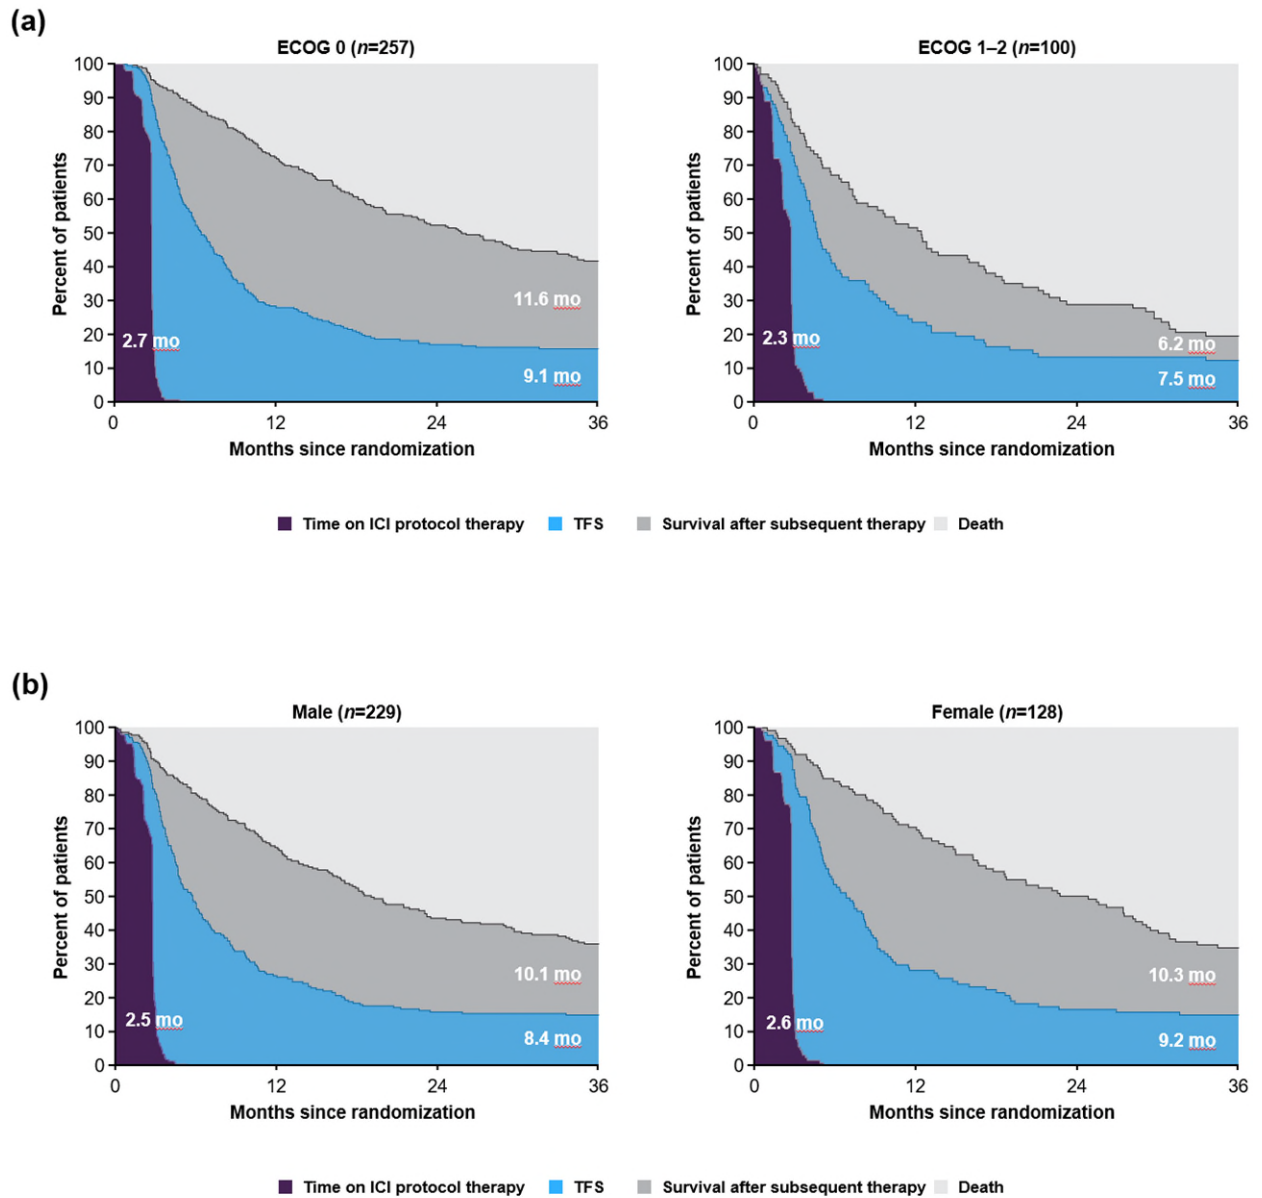

Supplement: mr-32-35-s001.pdf [file mr-32-35-s001.pdf]
